# Supplementary material for: Boosting acetone oxidation efficiency over MnO2 nanorods by tailoring crystal phases
Source: Royal Society of Chemistry journal article supplement (doi:10.1039/c9nj04192c), 2019-01-01
Supplement: c9nj04192c1.pdf [file c9nj04192c1.pdf]

*Supporting Information*

**Boosting acetone oxidation efficiency over MnO<sub>2</sub> nanorods by  
tailoring crystal phases**

Li Cheng, Jinguo Wang\*, Chi Zhang, Bei Jin and Yong Men

*College of Chemistry and Chemical Engineering, Shanghai University of Engineering  
Science, Shanghai 201620, P. R. China*

\*Author to whom correspondence should be addressed. E-mail address:

Jinguowang1982@sues.edu.cn, Tel: +86-21 6787 4046

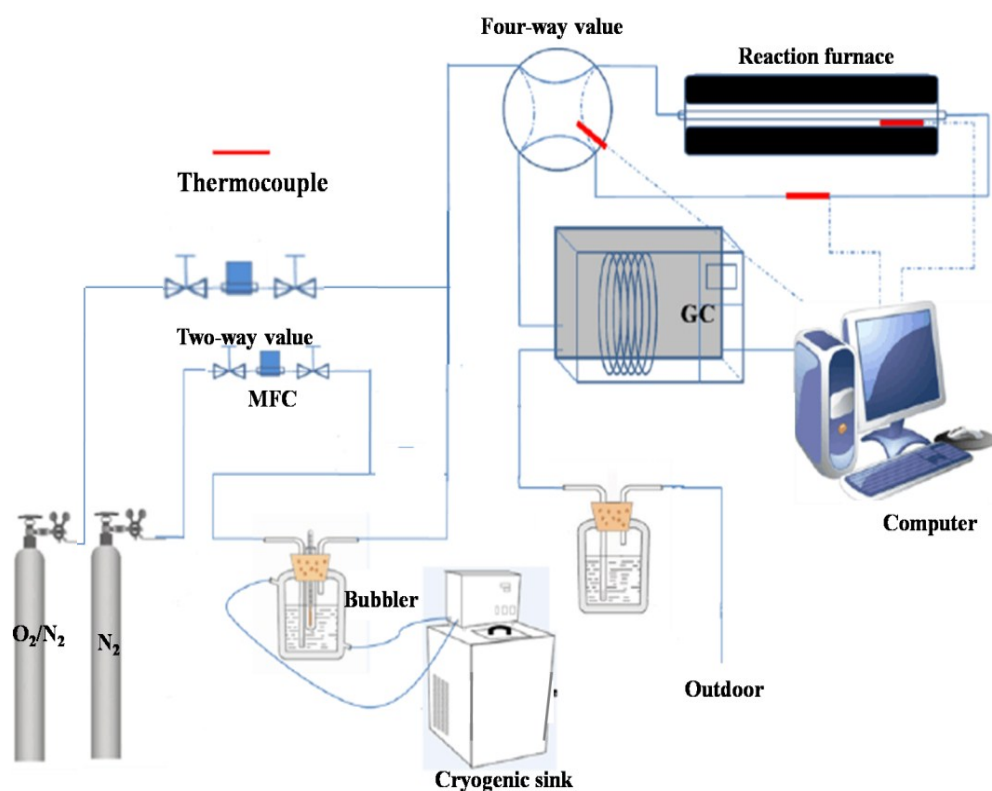

Fig. S1 Schematic flowing chart of the reaction system for acetone oxidation.

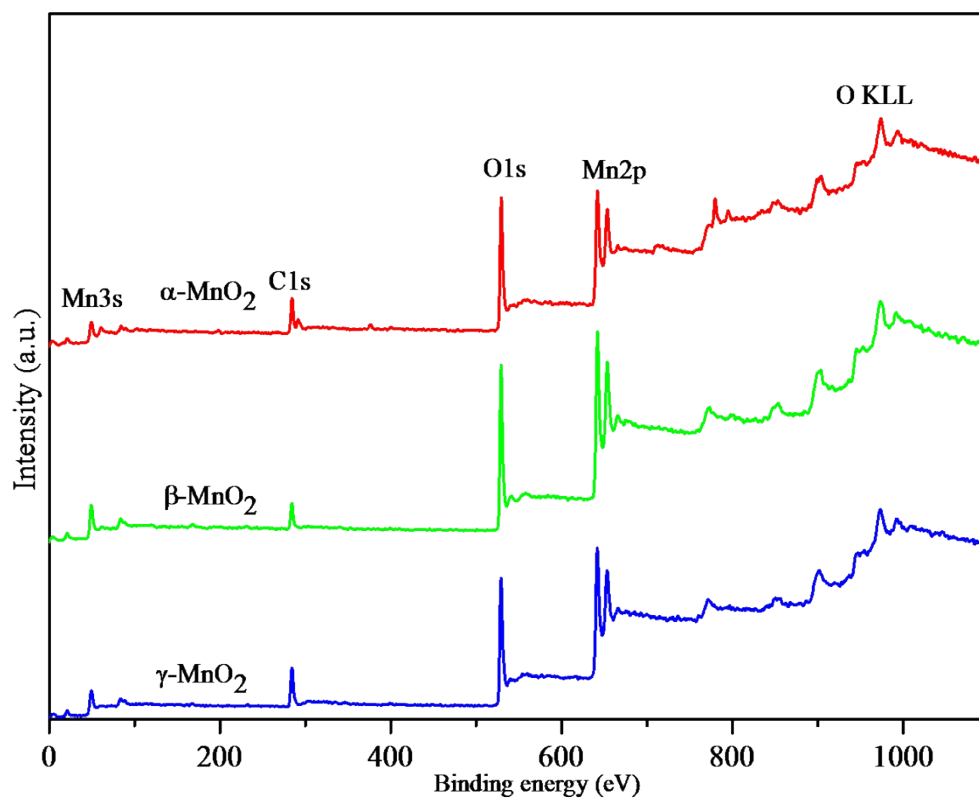

Fig. S2 XPS surveys of  $MnO_2$  with different crystal phases.

**Table S1** Activity data of different catalysts for acetone oxidation as previous studies.

| Catalyst                                                   | Acetone (ppm) | O <sub>2</sub> (vol%) | T <sub>50</sub> (°C) | T <sub>90</sub> (°C) | Reference |
|------------------------------------------------------------|---------------|-----------------------|----------------------|----------------------|-----------|
| $\alpha$ -MnO <sub>2</sub> nanorods                        | 1000          | 20                    | 93                   | 104                  | This work |
| CuCo <sub>2</sub> O <sub>4</sub> hollow spheres            | 1000          | 20                    | 157                  | 183                  | 1         |
| Ordered mesoporous Fe <sub>2</sub> O <sub>3</sub>          | 1000          | 20                    | 136                  | 186                  | 2         |
| CoAl mixed oxides                                          | 1000          | 20                    | 189                  | 222                  | 3         |
| Cu <sub>0.13</sub> Ce <sub>0.87</sub> O <sub>y</sub> foam  | 1000          | 20                    | 200                  | 223                  | 4         |
| MnO <sub>x</sub> /TiO <sub>2</sub> nanofibers              | 500           | 5.0                   | 275                  | 360                  | 5         |
| CuCeO <sub>x</sub> nanofibers                              | 500           | 20                    | 190                  | 225                  | 6         |
| V-TiO <sub>2</sub> -carbon composite                       | 500           | 5.0                   | 230                  | 292                  | 7         |
| V <sub>2</sub> O <sub>5</sub> /TiO <sub>2</sub> nanofibers | 500           | 5.0                   | 270                  | 300                  | 8         |
| Au/Fe <sub>2</sub> O <sub>3</sub> nanoparticles            | 700           | 10                    | ≈235                 | ≈268                 | 9         |
| Au/CeO <sub>2</sub> nanoparticles                          | 700           | 10                    | 218                  | 240                  | 10        |
| Ag/CeO <sub>2</sub> nanoparticles                          | 700           | 10                    | 220                  | 245                  | 10        |
| Cu/CeO <sub>2</sub> nanoparticles                          | 700           | 10                    | 240                  | 260                  | 10        |

**References:**

- [1] C. Zhang, J. G. Wang, S. F. Yang, H. Liang and Y. Men, *J. Colloid Interf. Sci.*, 2019, 539, 65-75.
- [2] Y. S. Xia, H. X. Dai, H. Y. Jiang, J. G. Deng and Y. X. Liu, *J. Hazard. Mater.*, 2011, 186, 84-91.
- [3] Q. Zhao, Y. L. Ge, K. X. Fu, N. Ji, C. F. Song and Q. L. Liu, *Chemosphere*, 2018, 204, 257-266.
- [4] C. Q. Hu, Q. S. Zhu, Z. Jiang, L. Chen and R. F. Wu, *Chem. Eng. J.*, 2009, 152,

583-590.

[5] X. C. Zhu, S. Zhang, X. N. Yu, X. B. Zhu, C. H. Zheng, X. Gao, Z. Y. Luo and K. F. Cen, *J. Hazard. Mater.*, 2017, 337, 105-114.

[6] R. Qin, J. H. Chen, X. Gao, X. B. Zhu, X. N. Yu and K. F. Cen, *RSC Adv.*, 2014, 4, 43874-43881.

[7] J. H. Chen, X. N. Yu, X. C. Zhu, C. H. Zheng, X. Gao and K. F. Cen, *Appl. Catal., A*, 2015, 507, 99-108.

[8] X. C. Zhu, J. H. Chen, X. N. Yu, X. B. Zhu, X. Gao and K. F. Cen, *RSC Adv.*, 2015, 5, 30416-30424.

[9] S. Minicò, S. Scire` and S. Galvagno, *Appl. Catal., B*, 2001, 34, 277-285.

[10] S. Scire` , P. M. Riccobene and C. Crisafulli, *Appl. Catal., B*, 2010, 101, 109-117.
